# Supplementary material for: Tuning assembly and enzymatic degradation of silk/poly(N-vinylcaprolactam) multilayers via molecular weight and hydrophobicity
Source: Royal Society of Chemistry journal article supplement (doi:10.1039/c5sm00464k), 2015-01-01
Supplement: c5sm00464k1.pdf [file c5sm00464k1.pdf]

## Supporting Information

Tuning Assembly and Enzymatic Degradation of Silk/Poly(N-vinylcaprolactam) Multilayers via  
Molecular Weight and Hydrophobicity

Alejandra Espinosa-Dzib, Jun Chen, Oleksandra Zavgorodnya, Veronika Kozlovskaya, Xing  
Liang and Eugenia Kharlampieva\*<sup>§</sup>

\*Department of Chemistry, <sup>§</sup>Center of Nanoscale Materials and Biointegration, University of  
Alabama at Birmingham, Birmingham, Alabama, 35294, United States

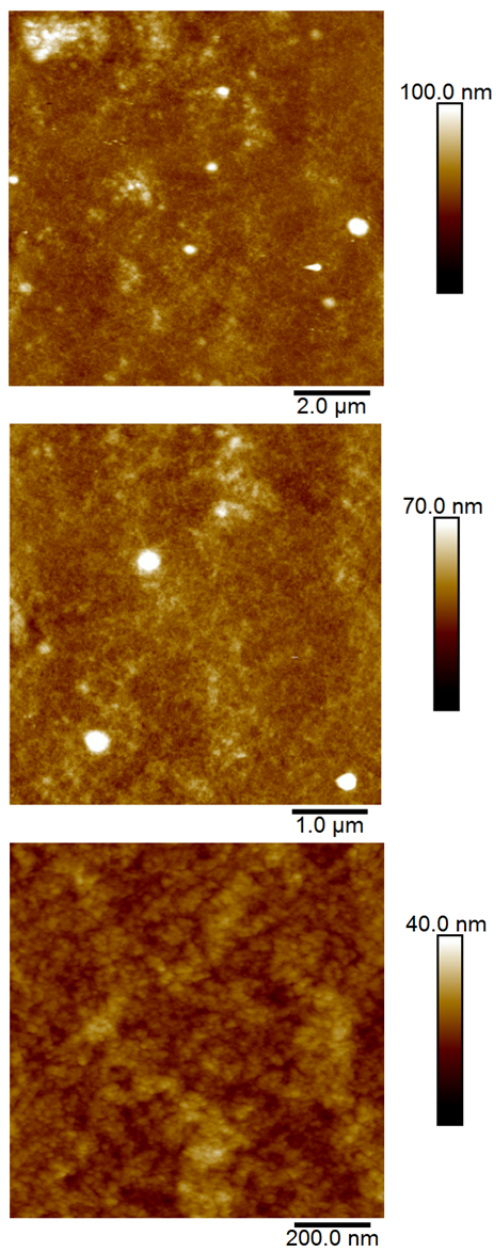

**Figure S1.** AFM height images of spin-assisted (silk)<sub>10</sub> film taken at 10 (top), 5 (middle), and 1 μm<sup>2</sup> (bottom) areas.

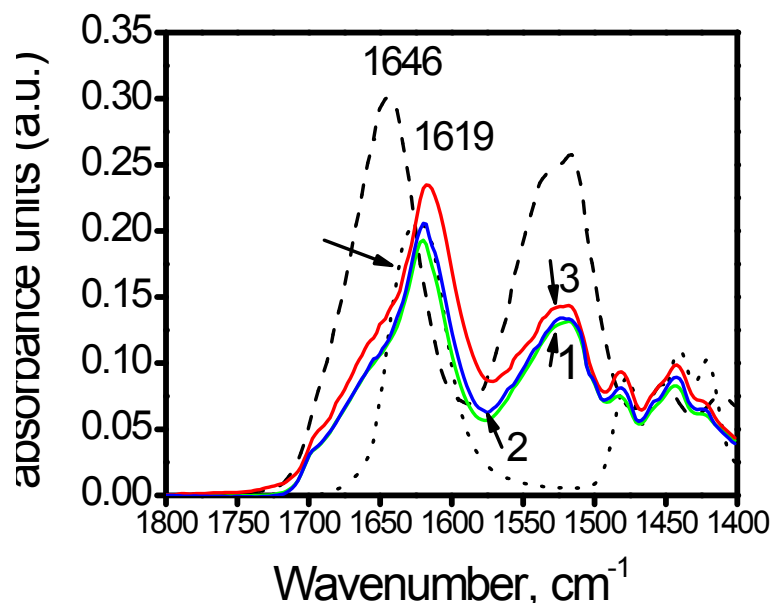

**Figure S2.** ATR-FTIR spectra of (SF/PVCL-80)<sub>10</sub> capsules prepared at pH=6 and freeze-dried (1) on the day of preparation, and after storage for (2) 3 days, and (3) 9 days in solution, and analyzed using ATR-FTIR spectroscopy. The spectra of pristine freeze-dried silk fibroin (dashed) and PVCL (dotted) have the vibrational bands centered at 1646 cm<sup>-1</sup> (corresponding to silk amide band) and at 1626 cm<sup>-1</sup> corresponding to PVCL carbonyl group.
